# Supplementary material
Source: PubMed Central journal article supplement (PMC6161409)
Supplement: supplementary_material.pdf [file supplementary_material.pdf]

## **Supplementary information**

### ***Tgfbr2* inactivation facilitates cellular plasticity and development of *Pten*-null prostate cancer**

#### **Inventory of Supplementary information**

Supplementary Figure Legends

Supplementary Figures

Figure S1. Related to Figure 1.

Figure S2. Related to Figure 1.

Figure S3. Related to Figure 1.

Figure S4. Related to Figure 2.

Figure S5. Related to Figure 3.

Figure S6. Related to Figure 4.

Figure S7. Related to Figure 6.

Figure S8. Related to Figure 7

Supplementary Table S1

Supplementary Table S2

Supplementary Materials and methods

Supplemental Figure 1

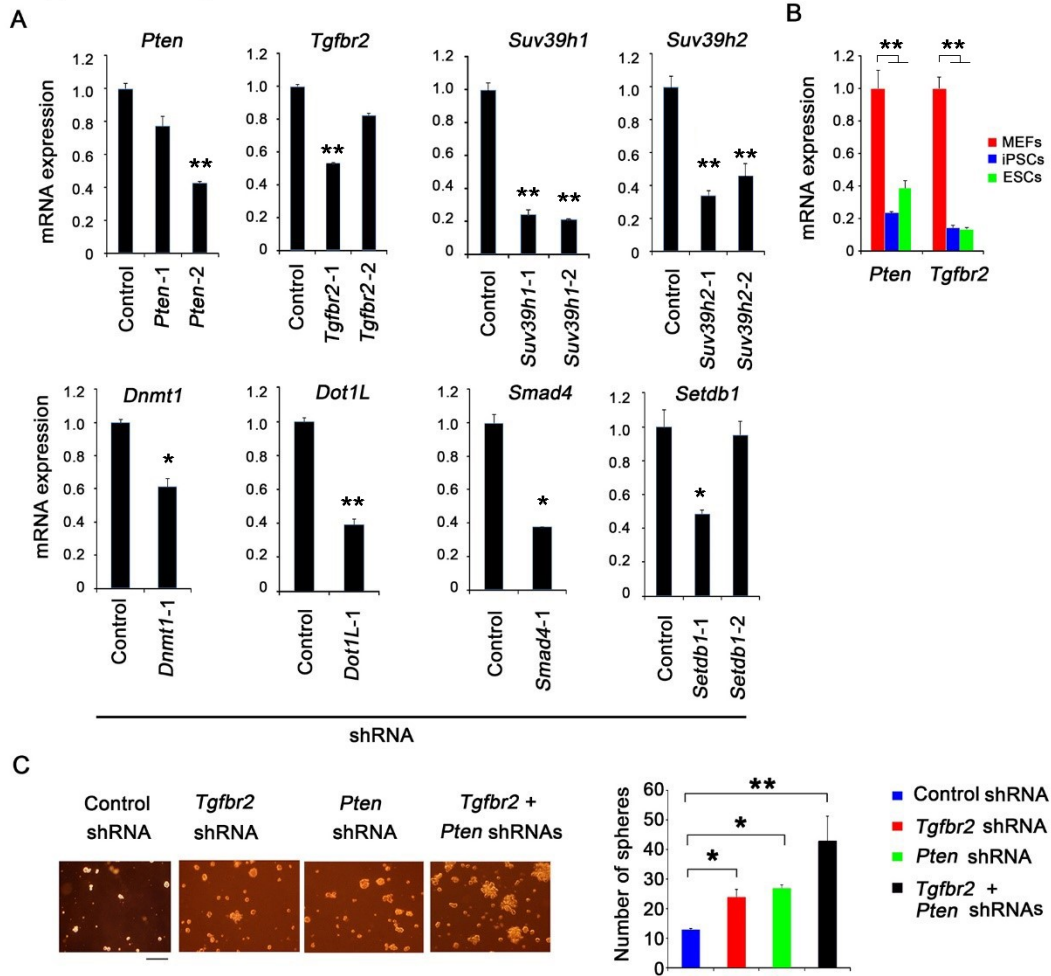

**Figure S1. Validation of shRNAs Knockdown Efficiency by Real-time PCR.** Related to Figure 1.

(A) MEFs were transduced with the lentivirus-mediated shRNA for 48 h, and total RNA was extracted for RT-real-time PCR analysis. For *Suv39h2* shRNA KD experiment, we add 2  $\mu$ g/ml puromycin at day 2 for positive selection (3 days).

(B) Real-time PCR analysis of *Pten* and *Tgfr2* expression in MEFs, iPSCs, and ESCs. All data are normalized by internal control *18S* RNA.

(C) TRAMP-C3 cells were transduced with indicated shRNA for 48 hours. Growth of the cells in 3D Matrigel culture (left). Representative phase-contrast images of each group depict progression of organoid growth 7 days with scale (0.1 mm) as shown (right). Sphere (>0.1 mm) numbers of each group.

Data are represented as mean  $\pm$  SD. Student's t test, \* $p$ <0.05, \*\* $p$ <0.01.

Supplemental Figure 2

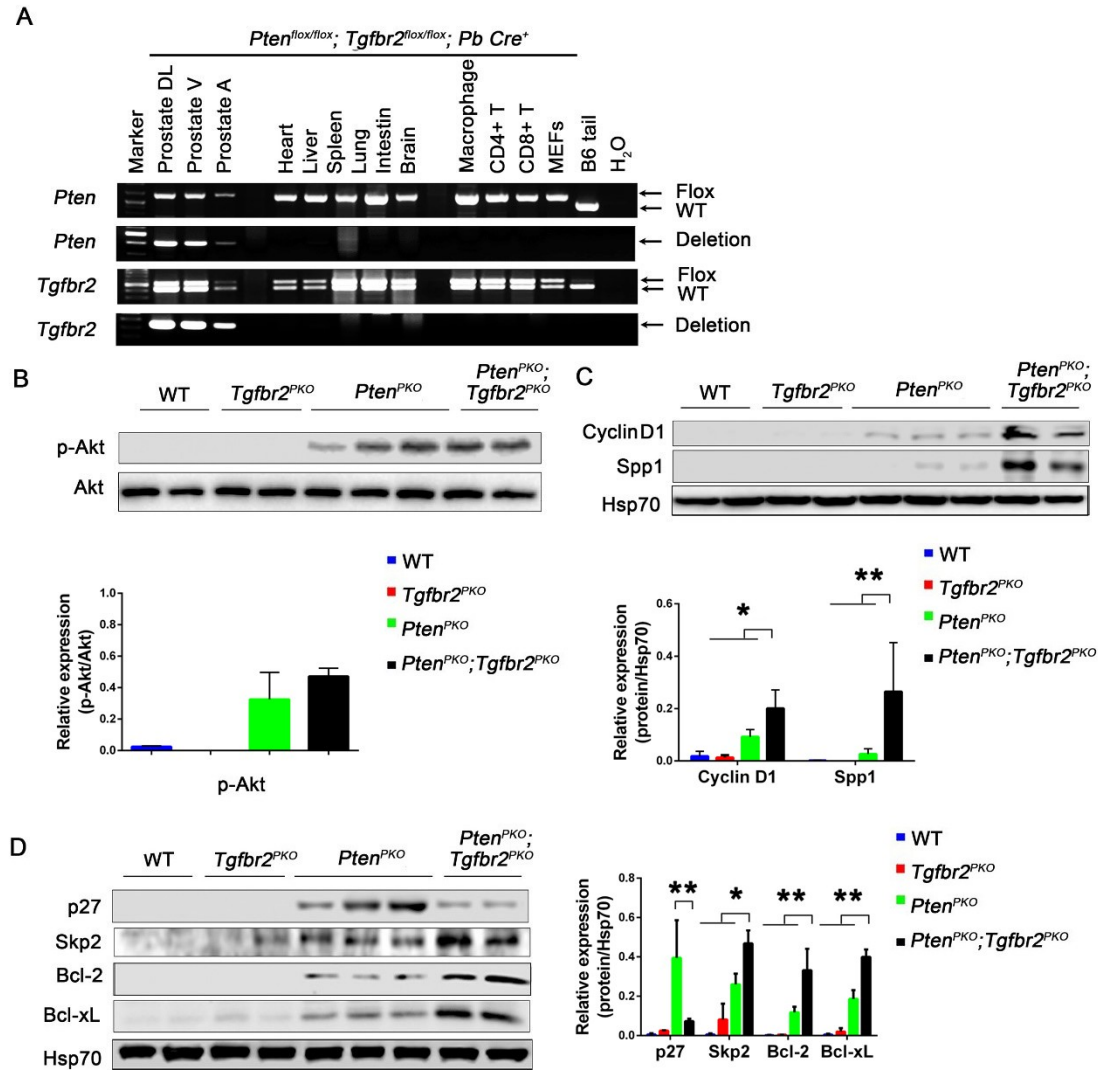

**Figure S2. Validation of *Pten* and *Tgfbr2* Conditional Knockout Mice.** Related to Figure 1.

(A) Genotyping analysis of *Pten* and *Tgfbr2* conditional knockout mouse strains. DL, dorsolateral; V, ventral; A, anterior.

(B) Western blot analysis of expression of phosphorylated Akt and Akt in prostates from mice with indicated genotypes.

(C) Western blot analysis of Cyclin D1 and Spp1 expression in the prostates from mice with the indicated genotypes.

(D) Western blot analysis of Bcl-xL, Bcl-2, Skp2, and p27 expression in prostate tissue from mice with the indicated genotypes.

Data are represented as mean  $\pm$  SD. Student's t test, \* $p < 0.05$ , \*\* $p < 0.01$ .

Supplemental Figure 3

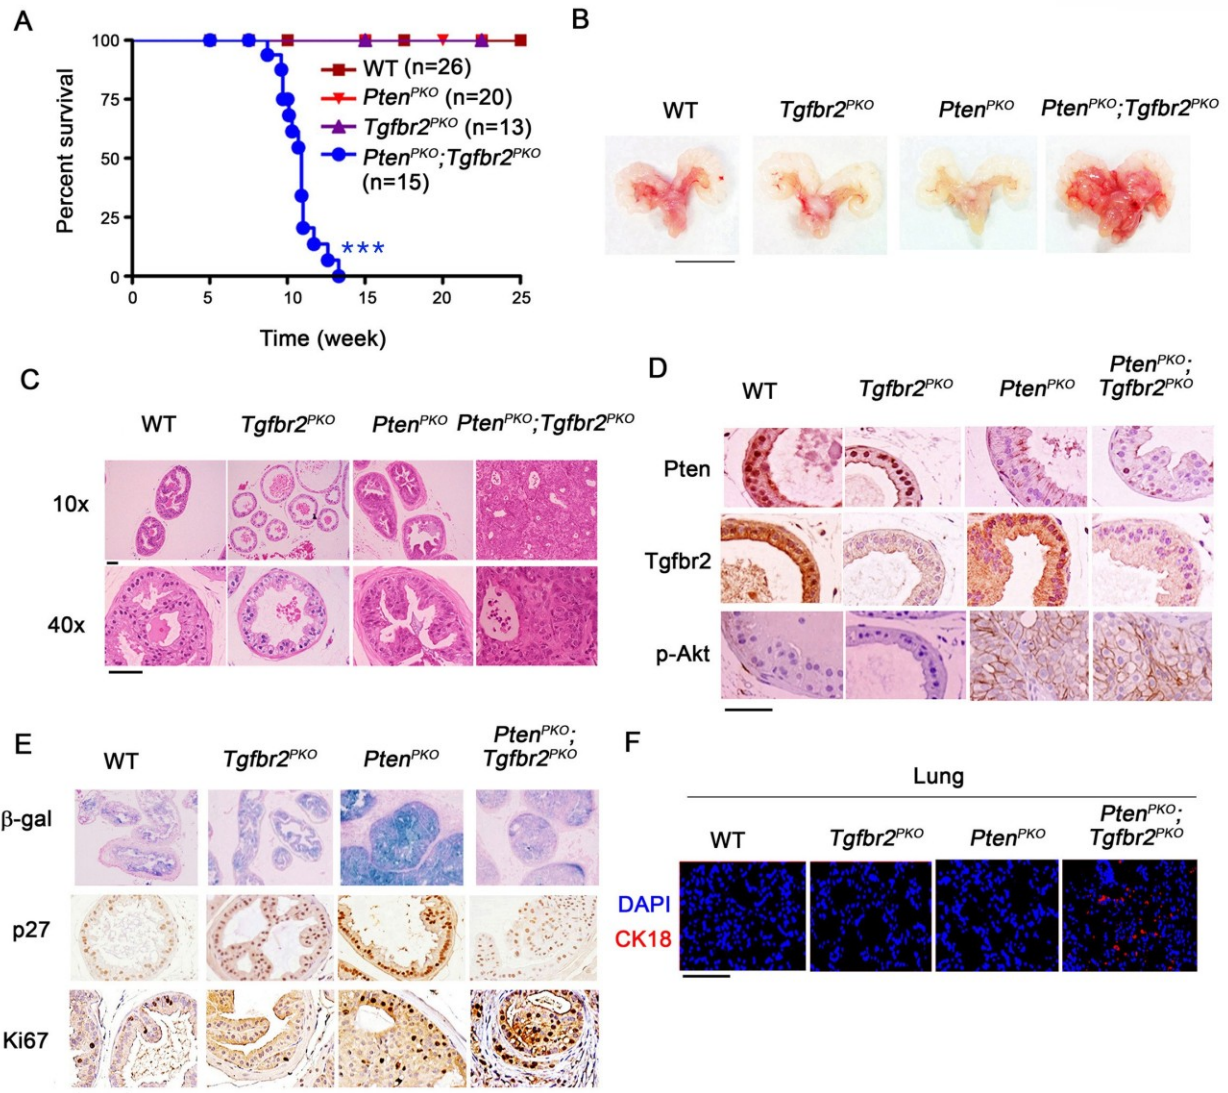

**Figure S3. Prostate Tumor Progression in Mice with Deletion of *Pten* and *Tgfr2*.** Related to Figure 1.

(A) Kaplan–Meier plots for mice with prostate-specific homozygous deletion of *Pten* ( $Pten^{PKO}$ ), *Tgfr2* ( $Tgfr2^{PKO}$ ), or both genes ( $Pten^{PKO}; Tgfr2^{PKO}$ ). \*\*\* $P < 0.001$  vs. corresponding control.

(B) Gross anatomy of representative prostates from 10-week-old mice. Scale bar = 10 mm.

(C) Hematoxylin and eosin (H&E)-stained sections of prostates from 10-week-old mice of the indicated genotypes. Increased number of cells in prostates from *Pten*<sup>PKO</sup>; *Tgfbr2*<sup>PKO</sup>, suggesting enhanced tumor formation. Scale bar = 100 μm.

(D) Immunohistochemical staining of Pten, Tgfbr2, and p-Akt (Ser 473) of prostates from mice with the indicated genotypes. Scale bar = 10 μm.

(E) Expression of β-galactosidase (β-Gal), p27, and Ki67 in prostates from mice with the indicated genotypes. Scale bar = 100 μm.

(F) Immunofluorescent staining of CK18 in lung tissues from mice with the indicated genotypes. Scale bar = 100 μm.

Supplemental Figure 4

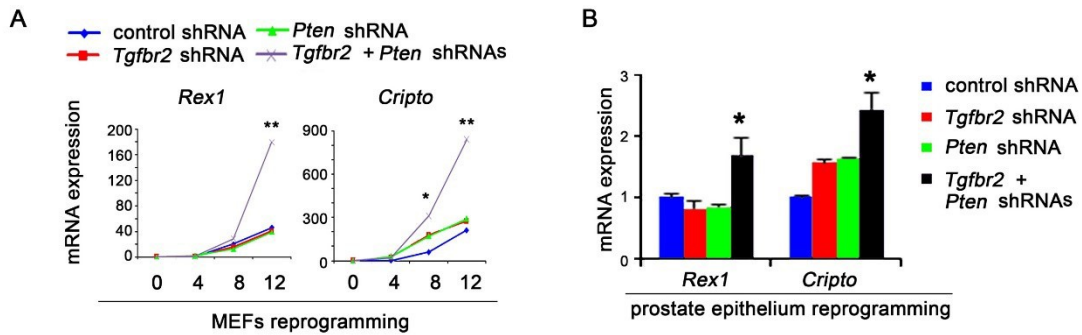

**Figure S4. Induction of pluripotency factors in reprogramming cells upon KD of *Pten* and *Tgfbr2*.** Related to Figure 2.

(A) *Tet-O-OSKM* cells were transduced with indicated shRNAs, with subsequent OSKM-mediated reprogramming for 12 days. RNA samples were collected at the indicated time points. Expression of *Rex1* and *Cripto* was analyzed by quantitative real-time PCR.

(B) TRAMP-C3 cells were transduced with indicated shRNAs, with subsequent OSKM-mediated reprogramming for 9 days. *Rex1* and *Cripto* expression was analyzed by quantitative real-time PCR.

Data are represented as mean  $\pm$  SD. Student's t test, \* $p < 0.05$ , \*\* $p < 0.01$ .

Supplemental Figure 5

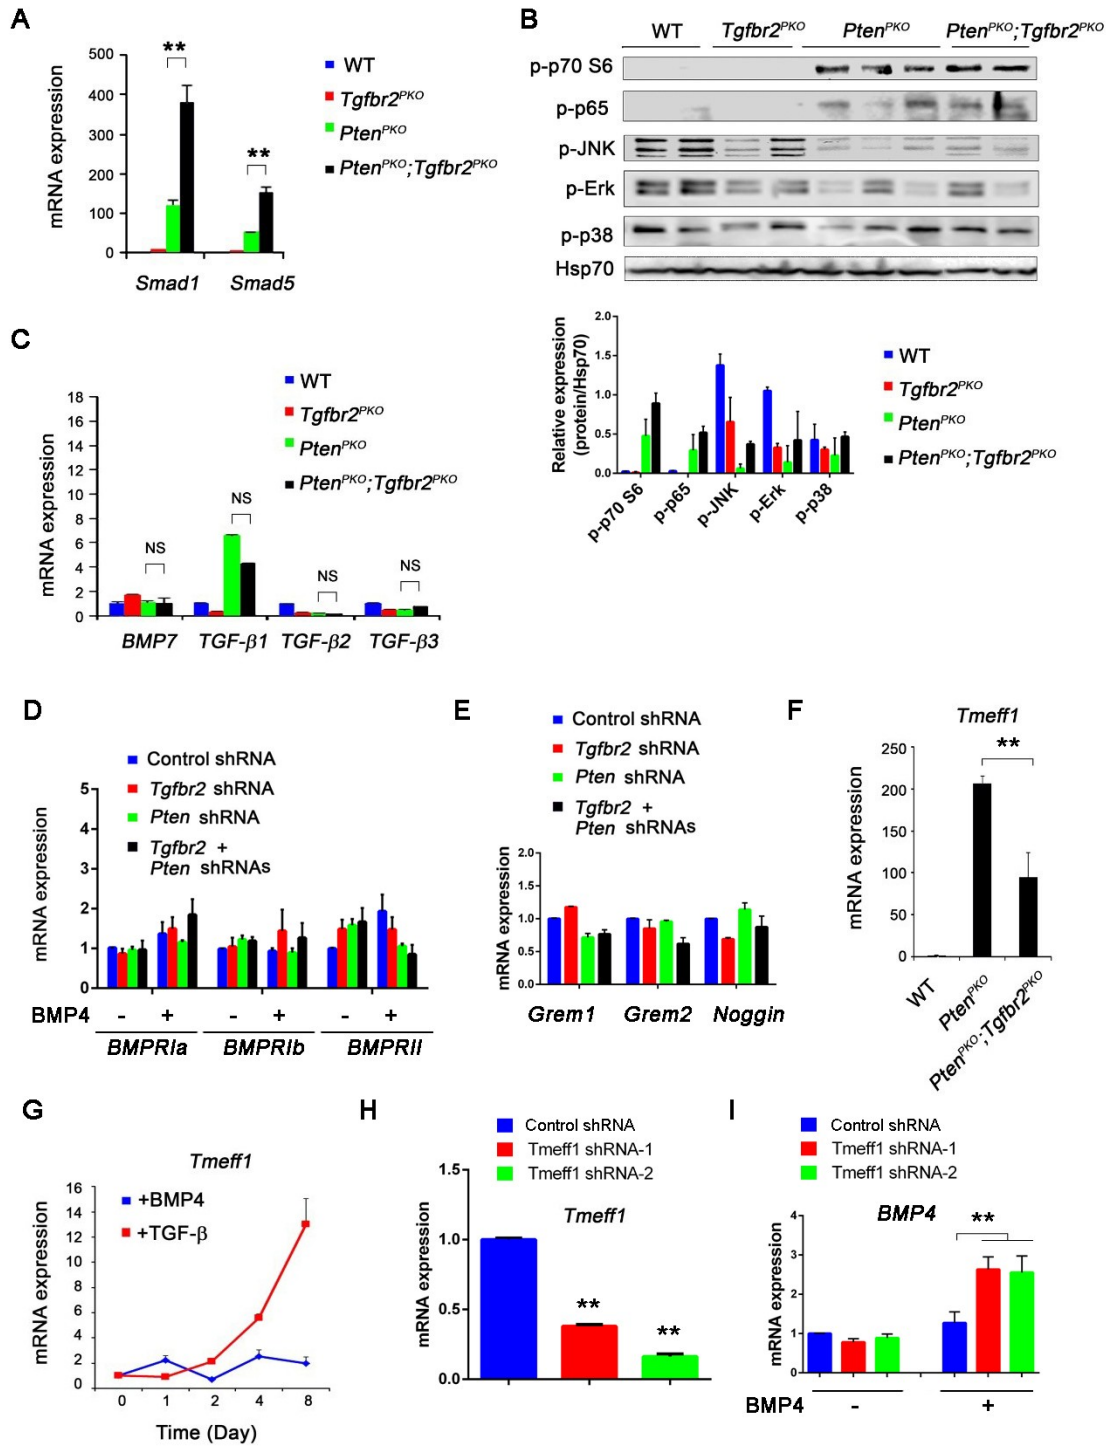

Figure S5. Interplay of TGF- $\beta$  and BMP Signaling in Prostate Cancer Cells. Related to Figure 3.

- (A) Expression of *Smad1* and *Smad5* was analyzed by real-time PCR in prostates from mice with indicated genotypes.
- (B) Western blot analysis of expression of phosphorylated p70 S6, phosphorylated p65, phosphorylated JNK, phosphorylated Erk, and phosphorylated p38 in prostates from mice with indicated genotypes.
- (C) Expression of *BMP7*, *TGF-β1*, *TGF-β2*, and *TGF-β3* was analyzed by real-time PCR in prostates from mice with indicated genotypes. NS, non-significant.
- (D) TRAMP-C3 cells were transduced with the indicated shRNA for 48 hours, and subsequently treated with 50 ng/ml BMP4 for 24 hours. Real-time PCR analysis of expression of BMP receptors (*BMPRIa*, *BMPRIb*, and *BMPRII*) was performed.
- (E) TRAMP-C3 cells were transduced with the indicated shRNA for 48 hours. Real-time PCR analysis of expression of BMP antagonists (*Gremlin1*, *Gremlin2*, and *Noggin*) was performed.
- (F) Expression of *Tmeff1* was analyzed by real-time PCR in prostates from mice with indicated genotypes.
- (G) TRAMP-C3 were treated with 50 ng/ml BMP4 or 10 ng/ml TGF-β for 8 days, expression of *Tmeff1* was analyzed by real-time PCR at indicated time points.
- (H) TRAMP -C3 were transduced with the lentivirus-mediated *Tmeff1* shRNA for 48 h, and total RNA was extracted for RT-real-time PCR analysis of *Tmeff1*.
- (I) TRAMP-C3 cells were transduced with the *Tmeff1* shRNA for 48 hours, and subsequently treated with 50 ng/ml BMP4 for 24 hours. Real-time PCR analysis of expression of *BMP4* was performed.

Data are represented as mean ± SD. Student's t test, \*p<0.05, \*\*p<0.01.



Supplemental Figure 6

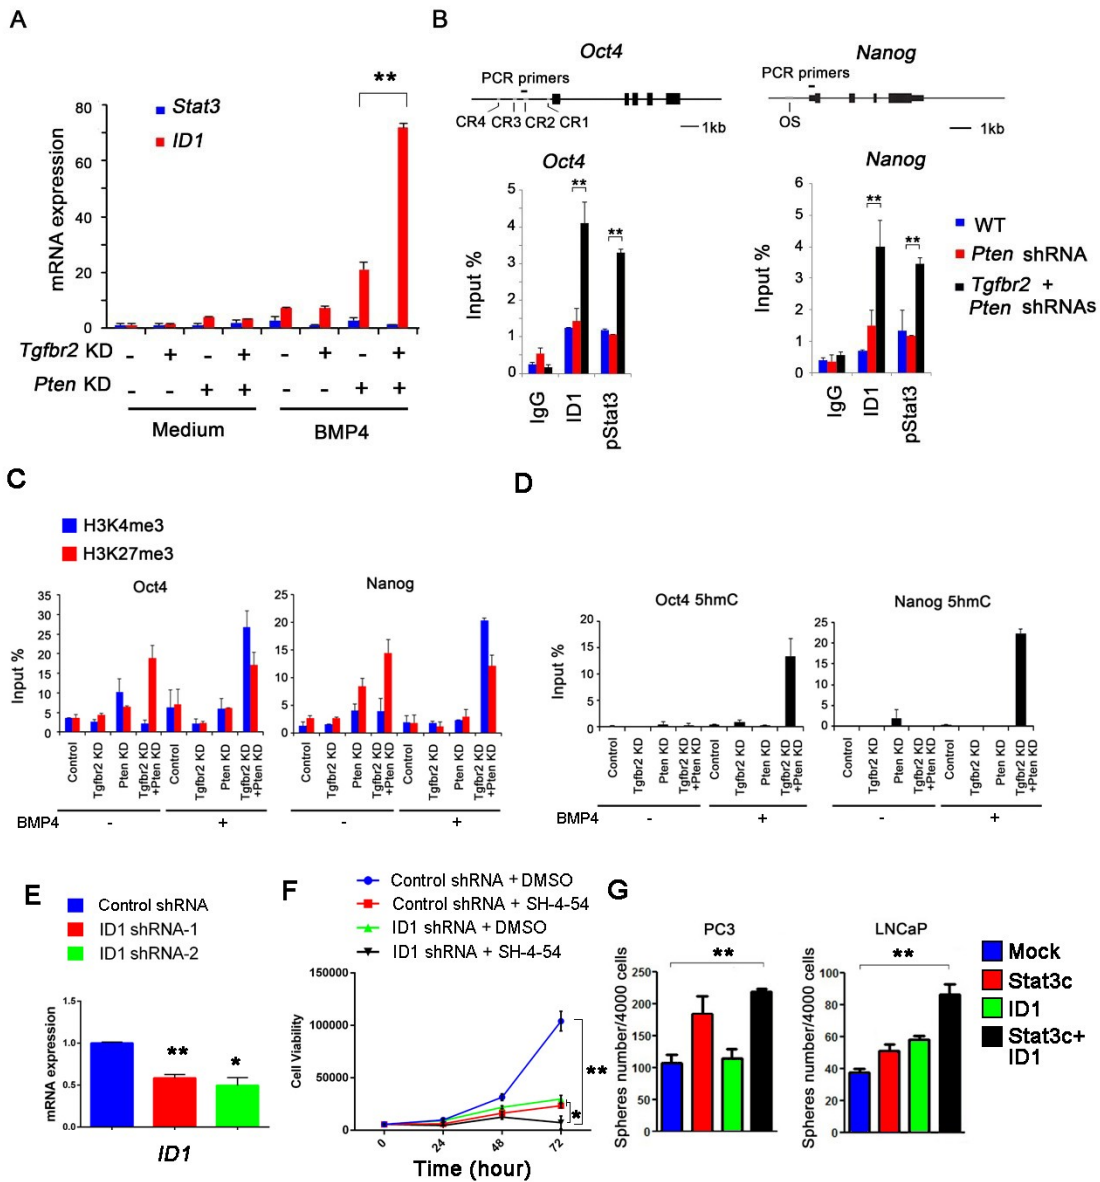

**Figure S6. ID1 and Stat3 Occupy Promoter Regions of Pluripotency Genes.** Related to Figure 4.

(A) TRAMP-C3 cells were transduced with the indicated shRNA for 48 hours, and subsequently treated with 50 ng/ml BMP4 for 24 hours. Real-time PCR analysis of expression of *Stat3* and *ID1* was performed.

(B) TRAMP-C3 cells were infected with control shRNA, *Pten* shRNA, or combination of *Tgfbr2* and *Pten* shRNAs for 8 days. ChIP-real-time PCR analysis of the binding of ID1 and Stat3 on *Oct4*, *Nanog*, and *Sox2* promoters in transduced prostate epithelial cells. Values are expressed as fold enrichment relative to input DNA. Black bars indicate primer locations.

(C) TRAMP-C3 cells were infected with control shRNA, *Tgfbr2* shRNA, *Pten* shRNA, or combination of *Tgfbr2* and *Pten* shRNAs for 48 hours. Next, the cells were treated with 50 ng/ml BMP4 for another 24 hours. ChIP-real-time PCR analysis of H3K4me3 and H3K27me3 at the *Oct4* and the *Nanog* promoter region of transduced TRAMP-C3 cells. Values are expressed as fold enrichment relative to input DNA.

(D) TRAMP-C3 cells were infected with control shRNA, *Tgfbr2* shRNA, *Pten* shRNA, or combination of *Tgfbr2* and *Pten* shRNAs for 48 hours. Next, the cells were treated with 50 ng/ml BMP4 for another 24 hours. ChIP-real-time PCR analysis of 5hmC at the *Oct4* and the *Nanog* promoter region of transduced TRAMP-C3 cells. Values are expressed as fold enrichment relative to input DNA.

(E) TRAMP-C3 cells were transduced with the lentivirus-mediated *IDI* shRNA for 48 h, and total RNA was extracted for RT-real-time PCR analysis of *IDI*.

(F) Growth of control Tramp-C3 cells versus *IDI* shRNA-2 KD combined with Stat3 inhibitor SH-4-54 treated Tramp-C3 cells.

(G) PC3 cells or LNCaP cells were transduced with indicated genes for 48 hours. Growth of the cells in 3D Matrigel culture. Sphere (>0.1 mm) numbers of each group.

Data are represented as mean  $\pm$  SD. Student's t test, \* $p < 0.05$ , \*\* $p < 0.01$ .

Supplemental Figure 7

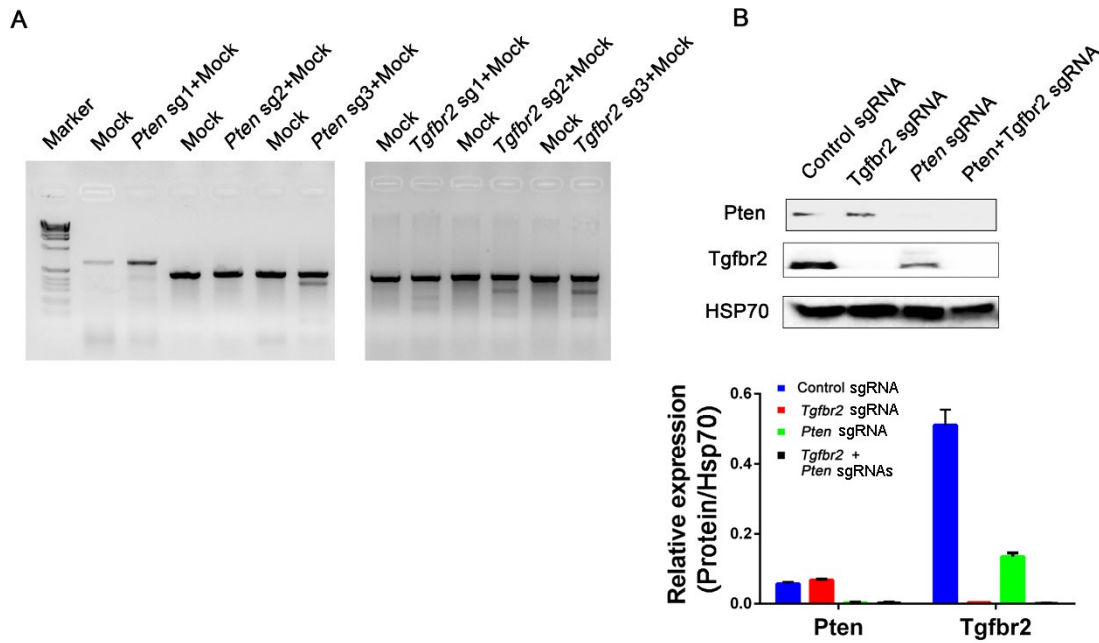

**Figure S7. Prostate-specific Depletion of Tgfbr2 Promotes Expression of EMT Genes in *Pten* deficient Mice.** Related to Figure 6.

(A) Indels induced by lentivirus-delivered sgRNA targeting the *Pten* and *Tgfbr2* gene in the TRAMP-C3 cells were assayed by surveyor digestion. All the cells were treated with 1  $\mu$ g/ml puromycin for 5 days after infection before assay as indicated.

(B) TRAMP-C3 cells were infected with control sgRNA, *Tgfbr2* sgRNA, *Pten* sgRNA, or combination of *Tgfbr2* and *Pten* sgRNAs for 2 days. Then, the cells were treated with 1  $\mu$ g/ml puromycin for another 5 days. Western blot analysis of expression of Pten and Tgfbr2 in TRAMP-C3 cells with indicated genotypes.

Data are represented as mean  $\pm$  SD. Student's t test, \* $p$ <0.05, \*\* $p$ <0.01.

Supplemental Figure 8

A

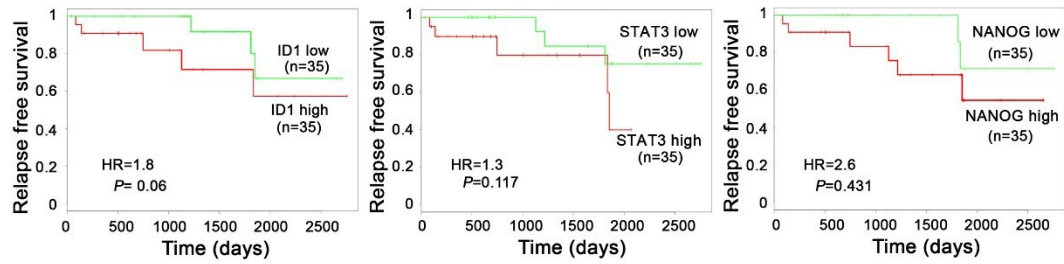

B

| Sex | Age | Grade | Stage | Gleason Grade | Gleason Score | TNM     |
|-----|-----|-------|-------|---------------|---------------|---------|
| M   | 77- | -     | -     | -             | -             | -       |
| M   | 70- | -     | -     | -             | -             | -       |
| M   | 27- | -     | -     | -             | -             | -       |
| M   | 70- | -     | -     | -             | -             | -       |
| M   | 35- | -     | -     | -             | -             | -       |
| M   | 77- | -     | -     | -             | -             | -       |
| M   | 80- | -     | -     | -             | -             | -       |
| M   | 80- | -     | -     | -             | -             | -       |
| M   | 35- | -     | -     | -             | -             | -       |
| M   | 73- | -     | -     | -             | -             | -       |
| M   | 73- | -     | -     | -             | -             | -       |
| M   | 27- | -     | -     | -             | -             | -       |
| M   | 69  | 3II   |       | 55+5          |               | T2N0M0  |
| M   | 66  | 3II   |       | 55+5          |               | T2N0M0  |
| M   | 66  | 3II   |       | 55+5          |               | T2N0M0  |
| M   | 69  | 3II   |       | 55+5          |               | T2N0M0  |
| M   | 75  | 3IV   | 4-5   | 5+4           |               | T2N1M1c |
| M   | 75  | 3IV   | 4-5   | 5+4           |               | T2N1M1c |
| M   | 80  | 3IV   |       | 55+4          |               | T4N1M1c |
| M   | 60  | 2IV   |       | 43+4          |               | T4N1M1c |
| M   | 64  | 2IV   |       | 43+4          |               | T3N0M1  |
| M   | 80  | 3IV   |       | 55+5          |               | T4N1M1c |
| M   | 64  | 2IV   |       | 33+3          |               | T3N0M1  |
| M   | 60  | 2IV   |       | 33+3          |               | T4N1M1c |

C

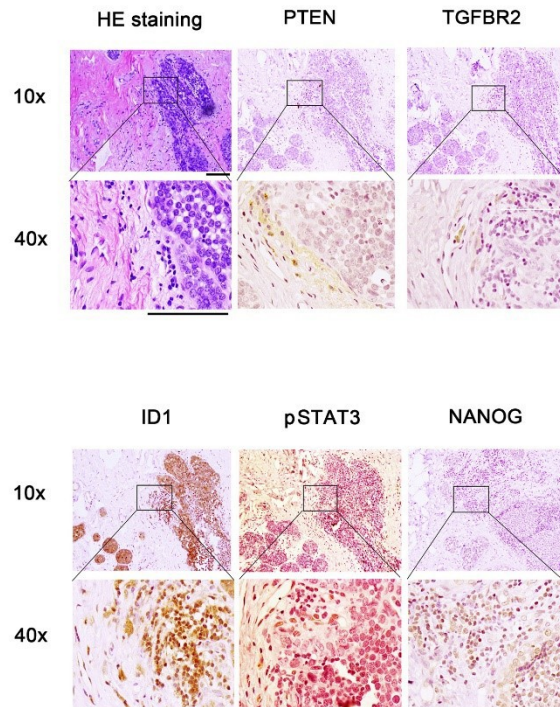

**Figure S8. Prognostic Potential of a Three-gene Signature in Human Prostate Cancer.** Related to Figure 7.

(A) Kaplan-Meier plots of the recurrence based on the expression of *ID1*, *STAT3*, or *NANOG* in patients. HR, Hazard ratio.

(B) Prostate cancer patient information of tissue microarray.

(C) HE staining and immunohistochemical staining with specific antibody against PTEN, TGFBR2, ID1, pSTAT3 and NANOG in a prostate cancer patient tumor sample. Scale bar, 200  $\mu$ m.

**Table S1. shRNA and sgRNA information.**

| shRNA number | Gene symbol | Open Biosystems shRNA library clone ID |
|--------------|-------------|----------------------------------------|
| 1            | Pten        | V2LMM_52491                            |
| 2            | Pten        | V2LMM_54320                            |
| 1            | Tgfbr2      | V2LMM_188921                           |
| 2            | Tgfbr2      | V3LMM_466224                           |
| 1            | Suv39h1     | V2LMM_17223                            |
| 2            | Suv39h1     | V3LMM_498634                           |
| 1            | Suv39h2     | V3LMM_480915                           |
| 2            | Suv39h2     | V3LMM_480917                           |
| 1            | Dnmt1       | V2LMM_43170                            |
| 1            | Dot1L       | V2LMM_193454                           |
| 1            | Smad4       | V3LMM_515311                           |
| 1            | Setdb1      | V3LMM_494966                           |
| 2            | Setdb1      | V3LMM_494967                           |
| 1            | Tmeff1      | V3LMM_516733                           |
| 2            | Tmeff1      | V3LMM_479434                           |
| 1            | ID1         | V3LMM_519695                           |
| 2            | ID1         | V3LMM_519694                           |
| sgRNA number | Gene symbol | sgRNA target sequence                  |
| 1            | Pten        | GCTAACGATCTCTTTGATGA                   |
| 2            | Pten        | AAAGACTTGAAGGTGTATAC                   |
| 3            | Pten        | ACAATATTGATGATGTAGTA                   |
| 1            | Tgfbr2      | AACTTTACCCGGGCGCCGAG                   |
| 2            | Tgfbr2      | ACTTTACCCGGGCGCCGAGA                   |
| 3            | Tgfbr2      | GCGCGGGGGGTGTCGTCGGT                   |

**Table S2. Primers used for this study.****Real-time PCR primers**

|                                 |                          |
|---------------------------------|--------------------------|
| mouse BMP4-forward              | GCCCTGCAGTCCTTCGCTGG     |
| mouse BMP4-reverse              | CTGACGTGCTGGCCCTGGTG     |
|                                 |                          |
| mouse Oct4 (endogenous)-forward | TCTTTCCACCAGGCCCCCGGCTC  |
| mouse Oct4 (endogenous)-reverse | TGCGGGCGGACATGGGGAGATCC  |
|                                 |                          |
| mouse Sox2 (endogenous)-forward | GTATCAGGAGTTGTCAAGGCAGAG |
| mouse Sox2 (endogenous)-reverse | GTATCAGGAGTTGTCAAGGCAGAG |
|                                 |                          |
| mouse Nanog-forward             | AAGCAGAAGATGCGGACTGT     |
| mouse Nanog-reverse             | ATCTGCTGGAGGCTGAGGTA     |
|                                 |                          |
| mouse Pten-forward              | TGGATTGACTTAGACTTGACCT   |
| mouse Pten-reverse              | GCGGTGTCATAATGTCTCTCAG   |
|                                 |                          |
| mouse Tgfr2-forward             | ACGTTCCCAAGTCGGATGTG     |
| mouse Tgfr2-reverse             | GCTGGCCATGACATCACTGT     |
|                                 |                          |
| mouse Tmeff1-forward            | GGGGACACCTACCAGAATGAG    |
| mouse Tmeff1-reverse            | AGATCCAGAGCCGTTATCAGAG   |
|                                 |                          |
| mouse IL6-forward               | CTGCAAGAGACTTCCATCCAG    |
| mouse IL6-reverse               | AGTGGTATAGACAGGTCTGTTGG  |
|                                 |                          |
| mouse Smad1-forward             | CGTGAAGGGTTGGGGAGCCG     |
| mouse Smad1-reverse             | TCCAGCCACTGGAGAGGGCC     |
|                                 |                          |
| mouse Smad5-forward             | CCAGCCGTGAAGCGATTGT      |

|                       |                        |
|-----------------------|------------------------|
| mouse Smad5-reverse   | CTCCTCCATAGCACCCCTTCT  |
|                       |                        |
| mouse ID1-forward     | CCTAGCTGTTTCGCTGAAGGC  |
| mouse ID1-reverse     | GTAGAGCAGGACGTTACCT    |
|                       |                        |
| mouse Stat3-forward   | GCCGACCCAGGTAGTGCTGC   |
| mouse Stat3-reverse   | GCCCTCCTGCTGAGGGCTCA   |
|                       |                        |
| mouse Snail-forward   | CACACGCTGCCTTGTGTCT    |
| mouse Snail-reverse   | GGTCAGCAAAGCACGGTT     |
|                       |                        |
| mouse Slug-forward    | CAGCGAACTGGACACACACA   |
| mouse Slug-reverse    | ATAGGGCTGTATGCTCCCGAG  |
|                       |                        |
| mouse Suv39h1-forward | GAGAGCTTGTCGACGACAC    |
| mouse Suv39h1-reverse | CTTCTGCACCAGGTAATTGGC  |
|                       |                        |
| mouse Suv39h2-forward | GTGCCTTGCCTAGTTTCACTT  |
| mouse Suv39h2-reverse | CCTTTGCTACCTTGATGCACAC |
|                       |                        |
| mouse Smad4-forward   | ACACCAACAAGTAACGATGCC  |
| mouse Smad4-reverse   | GCAAAGGTTTCACTTTCCCA   |
|                       |                        |
| mouse Dnmt1-forward   | GGTCAACGAGGCAGACATCA   |
| mouse Dnmt1-reverse   | TTCACCACAGCTTCCTCGTC   |
|                       |                        |
| mouse Dot1L-forward   | GAGGCTCAAGTCGCCTGTG    |
| mouse Dot1L-reverse   | GACCCACCGGATAGTCTCAAT  |
|                       |                        |
| mouse Setdb1-forward  | TGGACACCCAGGGTATGAGT   |

|                              |                                 |
|------------------------------|---------------------------------|
| mouse Setdb1-reverse         | GGTGAAGGAGGACAAGAGGC            |
|                              |                                 |
| mouse Cyclin D1-forward      | GCGTACCCTGACACCAATCTC           |
| mouse Cyclin D1-reverse      | ACTTGAAGTAAGATACGGAGGGC         |
|                              |                                 |
| mouse Spp1-forward           | ATCTCACCATTCGGATGAGTCT          |
| mouse Spp1-reverse           | TGTAGGGACGATTGGAGTGAAA          |
|                              |                                 |
| mouse Rex1-forward           | ACGAGTGGCAGTTTCTTCTTGGGA        |
| mouse Rex1-reverse           | TATGACTCACTTCCAGGGGGCACT        |
|                              |                                 |
| mouse Cripto-forward         | ATGGACGCAACTGTGAACATGATGTTTCGCA |
| mouse Cripto-reverse         | CTTTGAGGTCCTGGTCCATCACGTGACCAT  |
|                              |                                 |
| mouse BMP7-forward           | CCTGTCCATCTTAGGGTTGCC           |
| mouse BMP7-reverse           | GGCCTTGTAGGGGTAGGAGA            |
|                              |                                 |
| mouse TGF- $\beta$ 1-forward | CCACCTGCAAGACCATCGAC            |
| mouse TGF- $\beta$ 1-reverse | CTGGCGAGCCTTAGTTTGGAC           |
|                              |                                 |
| mouse TGF- $\beta$ 2-forward | GTCAAGGCTGAGAACGGGAA            |
| mouse TGF- $\beta$ 2-reverse | AAATGAGCCCCAGCCTTCTC            |
|                              |                                 |
| mouse TGF- $\beta$ 3-forward | GGACTTCGGCCACATCAAGAA           |
| mouse TGF- $\beta$ 3-reverse | TAGGGGACGTGGGTCATCAC            |
|                              |                                 |
| mouse BMPRIa-forward         | ACAGGAGGAATCGTGGAGGA            |
| mouse BMPRIa-reverse         | GTTCCAGCGGTTAGACACGA            |
|                              |                                 |
| mouse BMPRIb-forward         | CCTCGGCCCAAGATCCTAC             |



|                          |                         |
|--------------------------|-------------------------|
| mouse BMPRIb-reverse     | CCTAGACATCCAGAGGTGACA   |
|                          |                         |
| mouse BMPRII-forward     | GTGTTATGGTCTGTGGGAGAAAT |
| mouse BMPRII-reverse     | AAAGCGGTACGTTCCATTCTG   |
|                          |                         |
| mouse Gremlin1-forward   | AAGCGAGATTGGTGCAAACCT   |
| mouse Gremlin1-reverse   | GAAGCGGTTGATGATAGTGCG   |
|                          |                         |
| mouse Gremlin2-forward   | TGTGCTGGTAAAGGTAGCTGA   |
| mouse Gremlin2-reverse   | CCACCTCTCTGAGTTGTTGCT   |
|                          |                         |
| mouse Noggin-forward     | GCCAGCACTATCTACACATCC   |
| mouse Noggin-reverse     | GCGTCTCGTTCAGATCCTTCTC  |
| <b>ChIP-qPCR primers</b> |                         |
| mouse Sox2-pro-1-forward | GAAAAGGCTGGGAACAAGGC    |
| mouse Sox2-pro-1-reverse | GGTCCCAAACACGAGTCCT     |
|                          |                         |
| mouse Sox2-pro-2-forward | AGGACTCGTGTTTGGGAACC    |
| mouse Sox2-pro-2-reverse | TCTTCCAACCTTGTCGCCAG    |
|                          |                         |
| mouse Sox2-pro-3-forward | CTAGTTGGACAGTCGCCCTG    |
| mouse Sox2-pro-3-reverse | CTCCTTTCCCCATGCTACG     |
|                          |                         |
| mouse Oct4-pro-1-forward | CCCAATATGGGTGCTAGGAA    |
| mouse Oct4-pro-1-reverse | GTCCACCAGCATGAAAAGGT    |
|                          |                         |
| mouse Oct4-pro-2-forward | GGTGCGATGGGGCATCCGAG    |
| mouse Oct4-pro-2-reverse | CCCCTGGGTGGGTGGAGGAG    |
|                          |                         |
| mouse Oct4-pro-3-forward | GCCGTCTTCCACCAGGCC      |

|                           |                          |
|---------------------------|--------------------------|
| mouse Oct4-pro-3-reverse  | CCCACCTGGAGGCCCTTGGA     |
|                           |                          |
| mouse Oct4-pro-4-forward  | AGGGGATGGAGCCTGGGTGC     |
| mouse Oct4-pro-4-reverse  | GACCCCGAGCCCAACCAGA      |
|                           |                          |
| mouse Oct4-pro-5-forward  | GCAGCCTTGGGTGTAGTGGTGAAG |
| mouse Oct4-pro-5-reverse  | TGGAAAGACGGCTCACCTAGGGAC |
|                           |                          |
| mouse Nanog-pro-1-forward | CATTCCTTTCCCCACCCACA     |
| mouse Nanog-pro-1-reverse | CTGGTGAAAGATCCGAGCGA     |
|                           |                          |
| mouse Nanog-pro-2-forward | AAGCAGACTCCTTTGACCCG     |
| mouse Nanog-pro-2-reverse | AAACTTGCCTCTGGGTCCAC     |
|                           |                          |
| mouse Nanog-pro-3-forward | TGGACCCAGAGGCAAGTTTC     |
| mouse Nanog-pro-3-reverse | GGAGTCCAGAGAACTGGCTG     |
|                           |                          |
| mouse Nanog-pro-4-forward | CCGGCTTAGAGCTTGAACCA     |
| mouse Nanog-pro-4-reverse | TCCCAAGGGCGACGTAATTT     |
|                           |                          |
| mouse Snail-pro-1-forward | CAGGAAATCGGACCCCTCAG     |
| mouse Snail-pro-1-reverse | GAAGAAGCACCGAGGGGAAA     |
|                           |                          |
| mouse Slug-pro-1-forward  | GCGCTACAAAGGGAGGAAGT     |
| mouse Slug-pro-1-reverse  | CTGGTGCAGACTCCGACAAT     |

## **Supplementary Materials and methods**

### **Cell Culture**

mESCs and miPSCs were cultured in mESC medium (DMEM with 15% FBS, 1 mM L-glutamine (Life Technologies), 1% nonessential amino acids (Life Technologies), 0.1 mM  $\beta$ -mercaptoethanol (Sigma) and 1,000 U ml<sup>-1</sup> LIF (Santa Cruz) on irradiated feeder cells. MEFs were isolated by trypsin digestion of midgestation (E13.5) embryos followed by culture in fibroblast medium (DMEM with 10% FBS, 1 mM L-glutamine, 1% nonessential amino acids and 0.1 mM  $\beta$ -mercaptoethanol). TRAMP-C3 were cultured in Complete Growth medium (4mM L-glutamine, 1.5g/L sodium bicarbonate and 4.5g/L glucose supplemented with 0.005mg/ml bovine insulin and 10nm dehydroisoandrosterone, 90% with 5% fetal bovine serum and Nu-Serum IV 5%.

### **Lentivirus Transduction**

All lentiviruses were generated as prescribed before. Viral supernatants were collected at 48-72 hour after transfection and concentrated by ultracentrifugation at 25,000 rpm for 2 h at 4 °C. The MEF or TRAMP-C3 cells were infected concentrated virus with polybrene (8 ug/ml; Sigma). Typically, more than 95% of cells were successfully transduced using this methodology based on GFP cDNA transduction.

### **shRNA library screening**

shRNA library were purchased from Open Biosystems (GE Dharmacon). *Tet-O-OSKM* transgenic MEF cells were transduced with lentivirus-based shRNAs specific for 8 transcription

factors or epigenetic factors. Then the cells were reseeded on feeder cells at the desired density. 2 mg/ml Dox was added on day 2, and the iPSC colonies were stained for AP on days 12.

### **Mammosphere formation of prostate cancer cells**

Single-cell suspensions were resuspended at a density of 10,000–20,000 cells/ml in ultralow attachment 6 well plate (Corning) in mammosphere culture medium (Stemcell). Cultures were changed bi-weekly and mammosphere formation was monitored weekly.

### **3D culture prostate epithelial cells**

Viable single cells were plated in 24-well plate in 50% Matrigel (BD Biosciences) containing TRAMP-C3 medium. Cells were allowed to grow for the indicated time and fresh medium with or without cytokine was added every two days. Images were taken with a CCD camera-equipped Olympus microscope.

### **Alkaline Phosphatase (AP) Staining**

We used Alkaline Phosphatase Detection Kit (Vector lab) to determine alkaline phosphatase activity of reprogrammed cells, according to the manufacturer's instructions.

### **Immunoblotting Analysis**

Cells were lysed in RIPA buffer containing protease inhibitors. The supernatants were added to loading buffer and boiled for western blot as previously described.

Sox2 and Oct4 antibodies were purchased from life technologies, Nanog, Snail and Slug antibodies were from Abcam. Sma4, p-Smad2, p-Smad3, Smad1, Smad5, p-JNK, p-ERK, p-p38,

Cyclin-D1, Spp1, Stat3, p-Stat3 Y705, Bcl-x1, Bcl-2 antibodies were purchased from Cell Signaling Technology. Vimentin, SKP2, p27, ID1, HSP70 antibodies were came from Santa Cruz.

### **Immunohistochemistry**

Tissues were formalin-fixed, processed, and paraffin-embedded. H&E staining was done by the Cancer Pathology Laboratory (Methodist Hospital). Antigens were retrieved by autoclaving in 0.01 mol/L sodium citrate buffer pH 6.0 at 121°C/20 psi for 3-5 min. The peroxidase activity was blocked in 3% H<sub>2</sub>O<sub>2</sub> and nonspecific binding sites blocked in 10% Goat serum. The blocked sections were incubated overnight at 4°C with primary antibody (1% bovine serum albumin [BSA] in phosphate buffer saline with tween 20 [PBST]) followed by incubation with secondary antibody for 1 h. The slides were stained with diaminobenzidine for 2 min, counterstained with hematoxylin and mounted with Immuno-mount (Thermo Scientific).

### **ChIP Assay**

ChIP assay was performed according to the Imprint Ultra Chromatin Immunoprecipitation Kit manual (Sigma). Briefly, cells were grown to final count of  $1 \times 10^7$  cells for each reaction. Cells were cross-linked with 0.75% formaldehyde solution for 10 min at room temperature with gentle agitation and quenched with 0.125M glycine for 5 min. Cells were rinsed twice with cold PBS, lysed, and sonicated to solubilize and shear cross-linked DNA. The resulting chromatin extract was incubated overnight at 4°C with 5 µg antibody. Next day, each sample was added 20 µl blocked beads and then incubated at 4°C for 1 h. Beads were washed 5 times with RIPA buffer, once with TE containing 50 mM NaCl and complexes were eluted from beads in elution buffer. Reverse crosslinking was performed overnight at 65°C. Input DNA (reserved from sonication) was concurrently treated for crosslink reversal. DNA were treated with RNaseA, proteinase K

and purified. Primary antibodies used for IP were: ID1 (Santa Cruz), pStat3 Y705 (Cell signaling technology) 5hmC (Abcam), H3K4me3 (Abcam), H3K27me3 (Abcam), and mouse/rabbit IgG (Sigma). Relative Fold enrichments were calculated by determining the immunoprecipitation efficiency (ratios of the amount of immunoprecipitated DNA to that of the input sample).

### **Real-Time Quantitative PCR (qPCR)**

cDNA was generated from the total RNA of cells with SuperScript III Reverse Transcriptase (Life Technologies), using oligo (dT) as a primer. Gene transcripts were quantified by real-time PCR with SYBR Green real-time PCR SuperMix (Life Technologies) in a QuantStudio 6 Flex Real-time PCR system. All of the values of the target gene expression level were normalized to 18s RNA.

### **Xenograft**

All animal procedures listed in this article were performed as per the protocol approved by the Institutional Animal Care and Use Committee of Baylor College of Medicine and Houston Methodist Research Institute. Lentivirus transduced PC3 cells were grown to confluence in 250-ml flasks. Cells were resuspended in PBS to a concentration of  $2 \times 10^6$ /ml. Cell suspension (50  $\mu$ l with 50ul Matrigel) was injected subcutaneously in 8-week-old NOD/SCID- $\gamma$  mice. Tumor sizes were measured from days 26. Mice were sacrificed on day 34.
